# Supplementary material for: QMrebind: incorporating quantum mechanical force field reparameterization at the ligand binding site for improved drug-target kinetics through milestoning simulations
Source: PubMed Central journal article supplement — Chem Sci. 2023 Oct 24;14(45):13159–75. doi: 10.1039/d3sc04195f (PMC10664576; doi:10.1039/d3sc04195f), 2023-10-24
Supplement: SC-014-D3SC04195F-s001.pdf [file SC-014-D3SC04195F-s001.pdf]

# Supporting Information for QMrebind: Incorporating quantum mechanical force field reparameterization at the ligand binding site for improved drug-target kinetics through milestoning simulations

Anupam A. Ojha, Lane W. Votapka, and Rommie E. Amaro\*

*Department of Chemistry, University of California San Diego, La Jolla, CA, USA*

E-mail: ramaro@ucsd.edu

Table S1: Unbinding rate constants ( $s^{-1}$ ) for host-guest complexes obtained through QMrebind-reparameterized force field and the generic force field parameters employed in SEEKR2 simulations.

| Host-guest complex    | Experimental $k_{\text{off}}$ ( $s^{-1}$ ) | QMrebind+SEEKR2 $k_{\text{off}}$ ( $s^{-1}$ ) | SEEKR2 $k_{\text{off}}$ ( $s^{-1}$ ) |
|-----------------------|--------------------------------------------|-----------------------------------------------|--------------------------------------|
| BCD-1-propanol        | $(1.21 \pm 0.07) \times 10^8$              | $(1.94 \pm 0.01) \times 10^8$                 | $(5.31 \pm 0.02) \times 10^8$        |
| BCD-1-butanol         | $(3.8 \pm 0.6) \times 10^7$                | $(5.53 \pm 0.02) \times 10^7$                 | $(7.24 \pm 0.02) \times 10^7$        |
| BCD-methyl butyrate   | $(1.28 \pm 0.03) \times 10^7$              | $(1.87 \pm 0.01) \times 10^7$                 | $(3.48 \pm 0.01) \times 10^7$        |
| BCD-tertbutanol       | $(8.5 \pm 0.1) \times 10^6$                | $(9.40 \pm 0.04) \times 10^6$                 | $(1.46 \pm 0.01) \times 10^7$        |
| BCD-aspirin           | $(1.31 \pm 0.03) \times 10^6$              | $(3.04 \pm 0.02) \times 10^6$                 | $(5.82 \pm 0.03) \times 10^6$        |
| BCD-1-naphthylethanol | $(5. \pm 2.) \times 10^5$                  | $(7.42 \pm 0.06) \times 10^5$                 | $(2.28 \pm 0.02) \times 10^6$        |
| BCD-2-naphthylethanol | $(1.8 \pm 0.7) \times 10^5$                | $(2.40 \pm 0.02) \times 10^5$                 | $(2.85 \pm 0.02) \times 10^5$        |

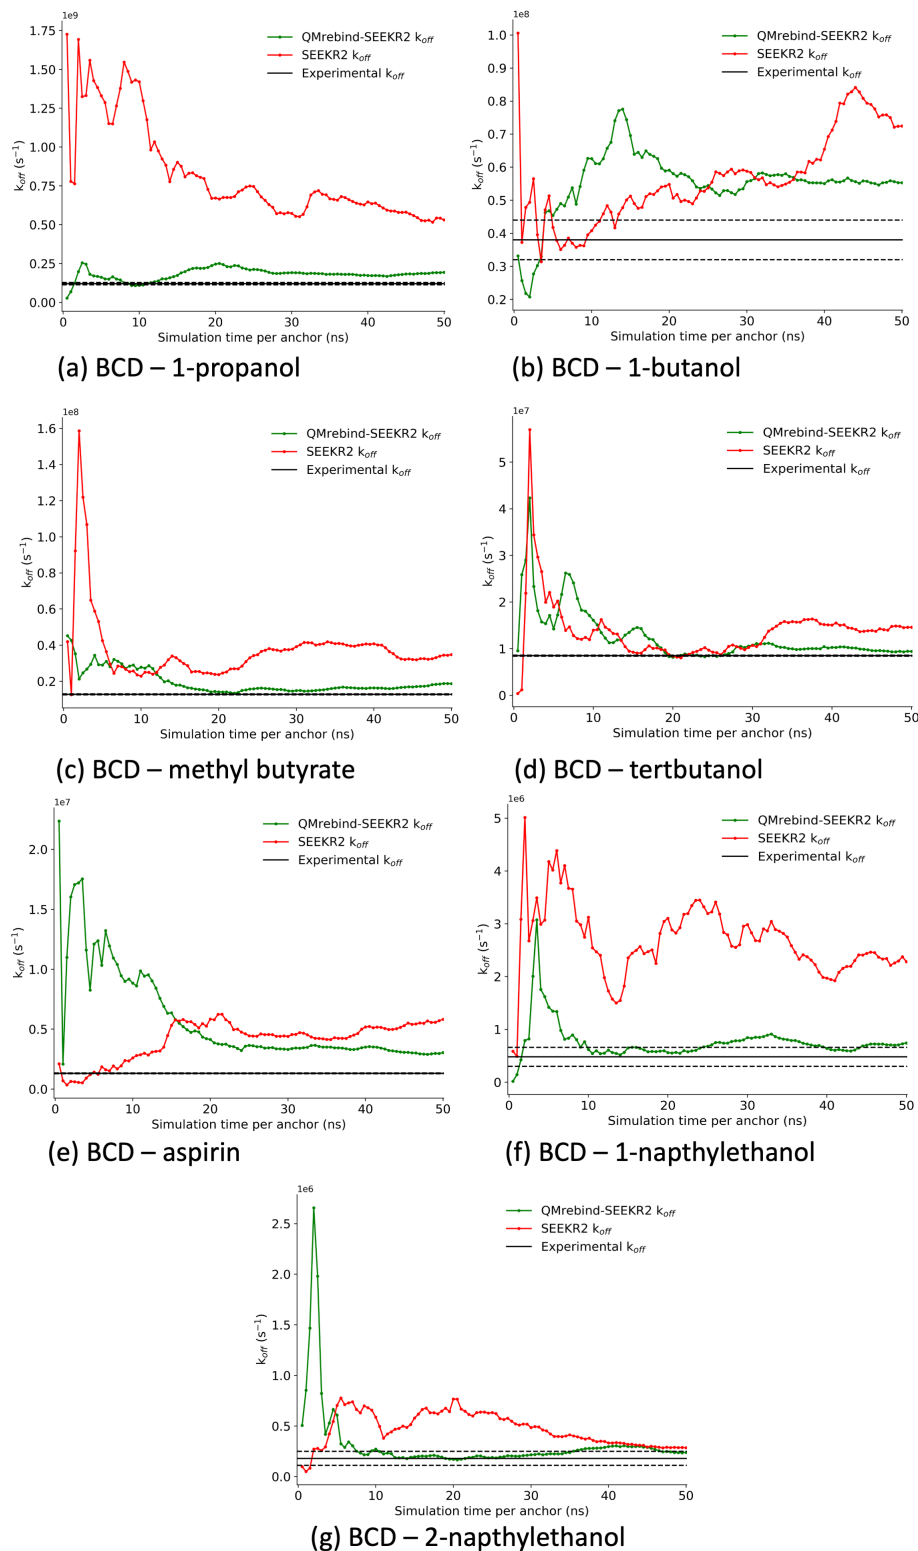

Figure S1: Evolution of receptor-ligand unbinding rate ( $k_{\text{off}}$ ) for the seven host-guest complexes over simulation time for the QMrebind-reparameterized force field (in green) and the generic force field (in red) parameters employed in the SEEKR2 method. The experimentally obtained  $k_{\text{off}}$  values for the host-guest complexes are in black.

Table S2: Residues within 5 Å cut-off distance from the ligand for Hsp90-inhibitor complexes

| Hsp90-inhibitor complex | Residues within 5 Å cut-off distance from the ligand                                                                                                                                                                                      |
|-------------------------|-------------------------------------------------------------------------------------------------------------------------------------------------------------------------------------------------------------------------------------------|
| Hsp90-Ligand 1          | Ile34, Asn36, Ser37, Ser38, Ala40, Leu41, Ile44, Val77, Thr79, Ile81, Gly82, Met83, Thr84, Lys85, Leu88, Ile89, Leu92, Gly93, Thr94, Ile95, Ala96, Gln118, Val121, Gly122, Phe123, Tyr124, Ile136, Lys138, Asn140, Thr169, Lys170, Ile172 |
| Hsp90-Ligand 2          | Ile34, Ser37, Ser38, Ala40, Leu41, Ile44, Val77, Thr79, Ile81, Gly82, Met83, Thr84, Lys85, Leu88, Gly93, Thr94, Ile95, Val121, Gly122, Phe123, Tyr124, Lys138, Asn140, Lys170, Ile172                                                     |
| Hsp90-Ligand 3          | Ile34, Ser37, Ser38, Ala40, Leu41, Ile44, Val77, Thr79, Ile81, Gly82, Met83, Thr84, Lys85, Leu88, Gly93, Thr94, Ile95, Val121, Gly122, Phe123, Tyr124, Ile136, Lys138, Asn140, Lys170, Ile172                                             |
| Hsp90-Ligand 4          | Ile33, Asn35, Ser36, Ser37, Ala39, Leu40, Ile43, Val76, Thr78, Ile80, Gly81, Met82, Thr83, Lys84, Leu87, Gly92, Thr93, Ile94, Ala95, Gln117, Val120, Gly121, Phe122, Tyr123, Lys137, Asn139, Lys169, Ile171                               |
| Hsp90-Ligand 8          | Ile33, Asn35, Ser36, Ser37, Ala39, Leu40, Ile43, Val76, Thr78, Ile80, Gly81, Met82, Thr83, Leu87, Gly92, Thr93, Ile94, Tyr123, Lys169, Ile171                                                                                             |
| Hsp90-Ligand 9          | Ile33, Asn35, Ser36, Ser37, Ala39, Leu40, Ile43, Val76, Thr78, Ile80, Gly81, Met82, Thr83, Leu91, Gly92, Thr93, Ile94, Tyr123, Lys137, Thr168, Lys169, Ile171                                                                             |
| Hsp90-Ligand 10         | Ile33, Asn35, Ser36, Ser37, Ala39, Leu40, Ile43, Val76, Thr78, Ile80, Gly81, Met82, Thr83, Leu87, Gly92, Thr93, Ile94, Val120, Tyr123, Lys137, Lys169, Ile171                                                                             |
| Hsp90-Ligand 22         | Gln7, Ser36, Ser37, Ala39, Leu40, Ile43, Thr78, Ile80, Gly81, Met82, Thr83, Leu87, Ile88, Gly92, Thr93, Lys96, Val120, Gly121, Phe122, Tyr123, Ser124, Ile135, Lys137, Glu147, Thr168, Lys169, Ile171                                     |
| Hsp90-Ligand 31         | Ile34, Ser37, Ser38, Leu41, Val77, Thr79, Ile81, Gly82, Met83, Thr84, Ile89, Gly93, Ile95, Tyr124, Ile136, Lys138, Lys170, Ile172                                                                                                         |
| Hsp90-Ligand 37         | Gln7, Ile33, Asn35, Ser36, Ser37, Ala39, Leu40, Ile43, Val76, Thr78, Ile80, Gly81, Met82, Thr83, Leu87, Ile88, Gly92, Thr93, Ala95, Val120, Gly121, Phe122, Tyr123, Ser124, Thr133, Ile135, Lys137, Glu147, Thr168, Lys169, Ile171        |
| Hsp90-Ligand 43         | Ile33, Asn35, Ser36, Ser37, Ala39, Leu40, Ile43, Val76, Thr78, Ile80, Gly81, Met82, Thr83, Leu87, Ile88, Gly92, Thr93, Ala95, Val120, Gly121, Tyr123, Thr133, Ile135, Lys137, Glu147, Thr168, Lys169, Ile171                              |
| Hsp90-Ligand 58         | Gln7, Ala11, Ile33, Ser36, Ser37, Ala39, Leu40, Thr78, Ile80, Gly81, Met82, Thr83, Leu87, Ile88, Gly92, Thr93, Lys96, Gly121, Tyr123, Ser124, Ile135, Lys137, Glu147, Thr168, Lys169, Ile171                                              |
| Hsp90-Ligand 58         | Gln7, Ile33, Ser36, Ser37, Leu40, Ile43, Thr78, Ile80, Gly81, Met82, Thr83, Leu87, Ile88, Gly92, Ala95, Tyr123, Ser124, Ile135, Lys137, Glu147, Lys169, Ile171                                                                            |
| Hsp90-Ligand 62         | Gln7, Ile33, Ser36, Ser37, Ala39, Leu40, Ile43, Thr78, Ile80, Gly81, Met82, Thr83, Lys84, Leu87, Ile88, Leu91, Gly92, Ala95, Val120, Tyr123, Ser124, Ile135, Asn139, Glu147, Lys169, Ile171                                               |
| Hsp90-Ligand 65         | Ile33, Ser36, Ser37, Ala39, Leu40, Ile43, Thr78, Ile80, Gly81, Met82, Thr83, Leu87, Ile88, Leu91, Gly92, Ala95, Lys96, Gly121, Tyr123, Ser124, Ile135, Lys137, Glu147, Thr168, Lys169, Ile171                                             |
| Hsp90-Ligand 67         | Gln7, Ile33, Ser36, Ser37, Leu40, Thr78, Ile80, Gly81, Met82, Thr83, Leu87, Ile88, Gly92, Lys96, Tyr123, Ser124, Ile135, Glu147, Lys169, Ile171                                                                                           |
| Hsp90-Ligand 70         | Ile33, Asn35, Ser36, Ser37, Ala39, Leu40, Ile43, Val76, Thr78, Ile80, Gly81, Met82, Thr83, Leu87, Ile88, Gly92, Ala95, Val120, Gly121, Phe122, Tyr123, Ser124, Ile135, Lys137, Asn139, Lys169, Ile171                                     |

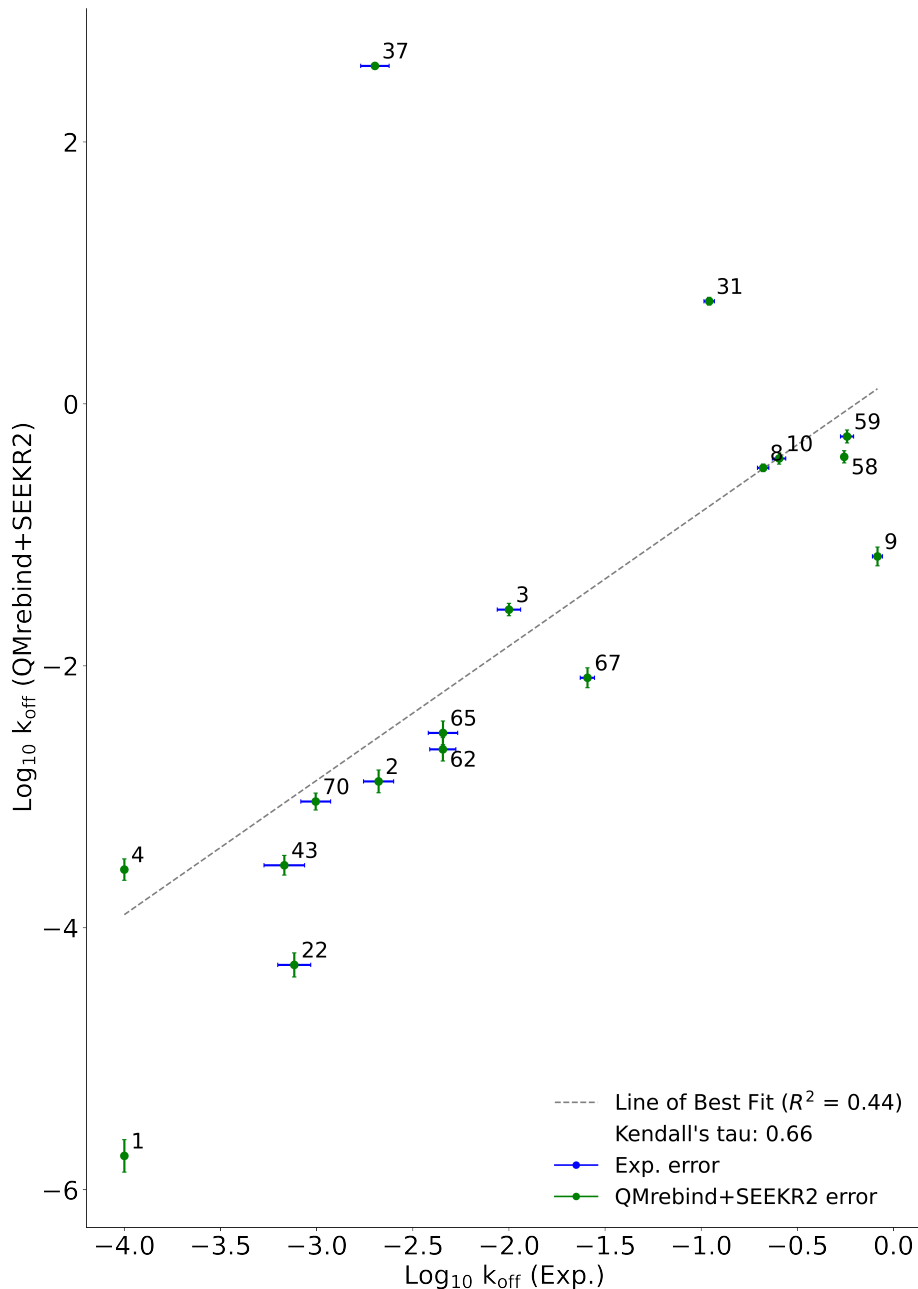

Figure S2: Scatter plot comparing the logarithm of experimental  $k_{\text{off}}$  values against the QMrebind+SEEKR2 estimated  $k_{\text{off}}$  values for Hsp90-inhibitor complexes. Each data point is labeled with its corresponding Hsp90-inhibitor complex ID, and error bars are shown for both data sets. The plot displays a line of best fit to indicate the correlation between the experimental and theoretically calculated  $k_{\text{off}}$ , with  $R^2$  values indicating the goodness of the fit and the computed Kendall's tau statistic, denoting the strength and direction of the ordinal association between the experimental  $k_{\text{off}}$  and the QMrebind+SEEKR2 estimated  $k_{\text{off}}$  values for Hsp90-Inhibitor complexes. In this plot, the  $R^2$  and Kendall's tau statistics included the outlier, compound 37, unlike Fig. 9 in the main text.

Table S3: Unbinding rate constants or  $k_{\text{off}}$  ( $\text{s}^{-1}$ ) for eight Hsp90-inhibitor complexes obtained from experiments, QMrebind-reparameterized force field, and the generic force field parameters employed in SEEKR2 simulations.

| Hsp90-inhibitor complex | Experimental $k_{\text{off}}$ ( $\text{s}^{-1}$ ) | QMrebind+SEEKR2 $k_{\text{off}}$ ( $\text{s}^{-1}$ ) | SEEKR2 $k_{\text{off}}$ ( $\text{s}^{-1}$ ) |
|-------------------------|---------------------------------------------------|------------------------------------------------------|---------------------------------------------|
| Hsp90-Ligand 1          | $< 1.000 \times 10^{-4}$                          | $(1.8 \pm 0.6) \times 10^{-6}$                       | $(9. \pm 4.) \times 10^{-8}$                |
| Hsp90-Ligand 4          | $< 1.000 \times 10^{-4}$                          | $(2.8 \pm 0.8) \times 10^{-4}$                       | $(3.89 \pm 0.07) \times 10^0$               |
| Hsp90-Ligand 22         | $(7.6 \pm 0.5) \times 10^{-4}$                    | $(5. \pm 2.) \times 10^{-5}$                         | $(3. \pm 1.) \times 10^{-7}$                |
| Hsp90-Ligand 3          | $(1.00 \pm 0.09) \times 10^{-2}$                  | $(2.7 \pm 0.4) \times 10^{-2}$                       | $(4.9 \pm 0.8) \times 10^2$                 |
| Hsp90-Ligand 67         | $(3. \pm 1.) \times 10^{-2}$                      | $(8.1 \pm 0.2) \times 10^{-3}$                       | $(1.413 \pm 0.009) \times 10^{-3}$          |
| Hsp90-Ligand 31         | $(1.1 \pm 0.4) \times 10^{-1}$                    | $(6.08 \pm 0.03) \times 10^0$                        | $(9.53 \pm 0.04) \times 10^3$               |
| Hsp90-Ligand 59         | $(5.73 \pm 0.02) \times 10^{-1}$                  | $(5.64 \pm 0.03) \times 10^{-1}$                     | $(4.18 \pm 0.04) \times 10^{-3}$            |
| Hsp90-Ligand 9          | $(8.2 \pm 0.5) \times 10^{-1}$                    | $(6.84 \pm 0.03) \times 10^{-2}$                     | $(5.01 \pm 0.02) \times 10^{-2}$            |

Table S4: Unbinding rate constants or  $k_{\text{off}}$  ( $\text{s}^{-1}$ ) for 17 Hsp90-inhibitor complexes (with references) obtained from experiments and QMrebind-reparameterized force field parameters employed in SEEKR2 simulations.

| Hsp90-inhibitor complex | Exp. $k_{\text{off}}$ ( $\text{s}^{-1}$ ) | Exp. $k_{\text{off}}$ reference | QMrebind+SEEKR2 $k_{\text{off}}$ ( $\text{s}^{-1}$ ) |
|-------------------------|-------------------------------------------|---------------------------------|------------------------------------------------------|
| Hsp90-Ligand 1          | $< 1.000 \times 10^{-4}$                  | 1                               | $(1.8 \pm 0.6) \times 10^{-6}$                       |
| Hsp90-Ligand 4          | $< 1.000 \times 10^{-4}$                  | 1                               | $(2.8 \pm 0.8) \times 10^{-4}$                       |
| Hsp90-Ligand 43         | $(6.80 \pm 0.05) \times 10^{-4}$          | 2                               | $(3. \pm 2.) \times 10^{-4}$                         |
| Hsp90-Ligand 22         | $(7.6 \pm 0.5) \times 10^{-4}$            | 1                               | $(5. \pm 2.) \times 10^{-5}$                         |
| Hsp90-Ligand 70         | $(10. \pm 1.) \times 10^{-4}$             | 1                               | $(9. \pm 6.) \times 10^{-4}$                         |
| Hsp90-Ligand 37         | $(2.0 \pm 0.2) \times 10^{-3}$            | 1                               | $(3.82 \pm 0.05) \times 10^2$                        |
| Hsp90-Ligand 2          | $(2.1 \pm 0.1) \times 10^{-3}$            | 1                               | $(1.31 \pm 0.05) \times 10^{-3}$                     |
| Hsp90-Ligand 62         | $(4.5 \pm 0.4) \times 10^{-3}$            | 1                               | $(2.30 \pm 0.03) \times 10^{-3}$                     |
| Hsp90-Ligand 65         | $(4.5 \pm 0.2) \times 10^{-3}$            | 1                               | $(3.08 \pm 0.03) \times 10^{-3}$                     |
| Hsp90-Ligand 3          | $(1.00 \pm 0.09) \times 10^{-2}$          | 1                               | $(2.7 \pm 0.4) \times 10^{-2}$                       |
| Hsp90-Ligand 67         | $(3. \pm 1.) \times 10^{-2}$              | 1                               | $(8.1 \pm 0.2) \times 10^{-3}$                       |
| Hsp90-Ligand 31         | $(1.1 \pm 0.4) \times 10^{-1}$            | 3                               | $(6.08 \pm 0.03) \times 10^0$                        |
| Hsp90-Ligand 8          | $(2.1 \pm 0.3) \times 10^{-1}$            | 3                               | $(3.2 \pm 0.4) \times 10^{-1}$                       |
| Hsp90-Ligand 10         | $(2.5 \pm 0.2) \times 10^{-1}$            | 1                               | $(3.83 \pm 0.07) \times 10^{-1}$                     |
| Hsp90-Ligand 58         | $(6. \pm 2.) \times 10^{-1}$              | 2                               | $(3.94 \pm 0.05) \times 10^{-1}$                     |
| Hsp90-Ligand 59         | $(5.7 \pm 0.2) \times 10^{-1}$            | 2                               | $(5.64 \pm 0.03) \times 10^{-1}$                     |
| Hsp90-Ligand 9          | $(8.2 \pm 0.5) \times 10^{-1}$            | 1                               | $(6.84 \pm 0.03) \times 10^{-2}$                     |

Table S5: Residues of Hsp90 protein interacting with ligands 1 and 9 within a cut-off distance of 4 Å

| Hsp90-inhibitor complex | Simulation time                 | Interacting residues                                                                                                                                                            |
|-------------------------|---------------------------------|---------------------------------------------------------------------------------------------------------------------------------------------------------------------------------|
| Hsp90-Ligand 1          | 10 $\mu$ s                      | Leu33, Asn36, Ser37, Asp39, Ala40, Lys43, Asp78, Ile81, Gly82, Met83, Thr84, Asp87, Leu92, Gly93, Thr94, Ile95, Gly120, Phe123, Val135, Hie139, Thr169, Val171                  |
| Hsp90-Ligand 1          | 6 $\mu$ s (0 - 6 $\mu$ s)       | Leu33, Asn36, Ser37, Asp39, Ala40, Lys43, Asp78, Ile81, Gly82, Met83, Leu92, Gly93, Thr94, Ile95, Gly120, Phe123, Val135, Hie139, Thr169, Val171                                |
| Hsp90-Ligand 1          | 2 $\mu$ s (6.50 - 8.50 $\mu$ s) | Leu33, Asn36, Ser37, Asp39, Ala40, Lys43, Asp78, Ile81, Gly82, Met83, Thr84, Asp87, Leu92, Gly93, Thr94, Gly120, Val121, Gly122, Phe123, Tyr124, Val135, Hie139, Thr169, Val171 |
| Hsp90-Ligand 9          | 10 $\mu$ s                      | Leu32, Asn35, Ser36, Asp38, Ala39, Lys42, Asp77, Ile80, Gly81, Met82, Leu91, Gly92, Thr93, Phe122, Thr136, Thr168, Val170                                                       |

Table S6: Contact frequencies of Hsp90 residues when interacting with ligand 1 (within the ligand-binding pocket) over two intervals, i.e., 0 - 6  $\mu$ s and 6.5 - 8.5  $\mu$ s. These intervals are chosen based on the consistency and distinctness of the COM-COM distances between the ligand and the Hsp90 receptor within each interval. Here, contact frequencies are expressed as a percentage of the total number of possible contacts.

| Hsp90 residues | Ligand 1 - residue contacts<br>from 0 -6 $\mu$ s (%) | Ligand 1 - residue contacts<br>from 6.5 -8.5 $\mu$ s (%) |
|----------------|------------------------------------------------------|----------------------------------------------------------|
| Glu32          | 99.80                                                | 100.00                                                   |
| Ser35          | 100.00                                               | 100.00                                                   |
| Asn36          | 100.00                                               | 100.00                                                   |
| Ser38          | 99.07                                                | 97.00                                                    |
| Asp39          | 100.00                                               | 100.00                                                   |
| Asp42          | 99.00                                                | 98.20                                                    |
| Val77          | 100.00                                               | 100.00                                                   |
| Gly80          | 100.00                                               | 100.00                                                   |
| Ile81          | 100.00                                               | 100.00                                                   |
| Gly82          | 100.00                                               | 100.00                                                   |
| Met83          | 55.33                                                | 85.40                                                    |
| Ala86          | 82.47                                                | 94.20                                                    |
| Asn91          | 100.00                                               | 100.00                                                   |
| Leu92          | 99.67                                                | 98.20                                                    |
| Gly93          | 99.93                                                | 100.00                                                   |
| Thr94          | 98.00                                                | 38.80                                                    |
| Phe119         | 95.87                                                | 100.00                                                   |
| Gly120         | 7.80                                                 | 100.00                                                   |
| Val121         | 4.20                                                 | 99.00                                                    |
| Gly122         | 100.00                                               | 100.00                                                   |
| Phe123         | 0.00                                                 | 97.20                                                    |
| Thr134         | 99.67                                                | 100.00                                                   |
| Ile136         | 24.27                                                | 5.80                                                     |
| Lys138         | 93.00                                                | 98.20                                                    |
| Gly168         | 100.00                                               | 100.00                                                   |
| Lys170         | 100.00                                               | 100.00                                                   |
| Lys209         | 100.00                                               | 100.00                                                   |

## References

- (1) Kokh, D. B.; Amaral, M.; Bomke, J.; Gradler, U.; Musil, D.; Buchstaller, H.-P.; Dreyer, M. K.; Frech, M.; Lowinski, M.; Vallee, F., et al. Estimation of drug-target residence times by  $\tau$ -random acceleration molecular dynamics simulations. *Journal of chemical theory and computation* **2018**, *14*, 3859–3869.
- (2) Schuetz, D. A.; Richter, L.; Amaral, M.; Grandits, M.; Gradler, U.; Musil, D.; Buchstaller, H.-P.; Eggenweiler, H.-M.; Frech, M.; Ecker, G. F. Ligand desolvation steers on-rate and impacts drug residence time of heat shock protein 90 (Hsp90) inhibitors. *Journal of Medicinal Chemistry* **2018**, *61*, 4397–4411.
- (3) Amaral, M.; Kokh, D.; Bomke, J.; Wegener, A.; Buchstaller, H.; Eggenweiler, H.; Matias, P.; Sirrenberg, C.; Wade, R.; Frech, M. Protein conformational flexibility modulates kinetics and thermodynamics of drug binding. *Nature communications* **2017**, *8*, 2276.
